# Supplementary material for: Curing time: a temporally explicit life cycle CO2 accounting of mineralization, bioenergy, and CCS in the concrete sector
Source: Royal Society of Chemistry journal article supplement (doi:10.1039/d0fd00139b), 2021-01-01
Supplement: d0fd00139b1.zip [file TanzerEtAl_FD_ESI.xlsx]

## Sheet: Meta
Supplemental Information for
	Curing time: A temporally explicit life cycle CO₂ accounting of mineralization, bioenergy, and CCS in the concrete sector
	S.E. Tanzer, K. Blok, A. Ramírez
	Faraday Discussions
Corresponding Author
	S.E. Tanzer
	s.e.tanzer@tudelft.nl
Abstract
	The decarbonization of concrete production is likely to require a multi-pronged approach including abatement of CO₂ emissions from cement production as well as the storage of CO₂ within concrete itself. This study explores the potential decarbonization impact of combinations of bioenergy and carbon capture and storage (CCS) during cement production, accelerated carbonation of fresh concrete, and …

## Sheet: Model Parameters
Parameter	Qty	Unit	Notes	Source
The process model parameters below are provided for the benchmark scenario unless otherwise specified.
Please refer to the methods section of the paper for information on differences in other scenarios.
Meal Grinding - Ball Mill
CaCO3	774	kg/t meal		Schakel 2018
Sand	135	kg/t meal		Schakel 2018
Iron Ore	23	kg/t meal		Schakel 2018
Bauxite	33	kg/t meal		Schakel 2018
Clay	3	kg/t meal	The quantities in Schakel 2018 do not add up to 100%	Assumed
Electricity	12	kWh/t meal		Worrell 2007
Clinker Production - Short Dry Kiln with Precalciner and Preheater
Raw meal	1.57	t/t clinker
Calcination Efficiency	100	%		Assumed
Thermal Energy Demand	3.3	GJ/t clinker		European Commission 2013
Electricity demand	23	kWh/t clinker		Worrel 2007
Cement Mixing - Roller Mill
Clinker	950	kg/t cement
gypsum IN	50	kg/t cement
electricity demand	16	kWh/t clinker		Worrel 2007
Concrete Mixing
cement in concrete	344	kg / m³ concrete		ecoinvent 3.6
sand use in concrete	859	kg / m³ concrete		ecoinvent 3.6
aggregate use in concrete	960	kg / m³ concrete		ecoinvent 3.6
water use in concrete	207	kg / m³ concrete		ecoinvent 3.6
admixture in concrete	1	kg / m³ concrete		ecoinvent 3.6
electricity demand	5	kWh / m³ concrete		ecoinvent 3.6
density of concrete	2371	kg / m³ concrete		ecoinvent 3.6
transport of raw material	200	km		ecoinvent 3.6
water use (not in concrete)	40	kg / m³ concrete		ecoinvent 3.6
CO₂ Injection, curing - 2 hour, 150kPa
electricity demand	3	kWh/t CO₂/ hr		Monkman & Shao 2010
CO₂ uptake	10	% of cement calcination CO₂		assumed, based of literature review
CO₂ uptake efficiency	60	% of CO₂ injected		assumed
CO₂ Injection, into mixer
electricity demand	37.5	kWh / t CO₂		Monkman & MacDonald 2017
CO₂ uptake	0.3	% of cement calcination CO₂		Monkman & MacDonald 2017
CO₂ uptake efficiency	60	% of CO₂ injected		Monkman & MacDonald 2017
CO₂ Capture, monoethanolamine solvent absorption
Capture Efficiency	90	% of CO₂ in
electricity demand	15	kWh / t CO₂ captured		Jakobsen 2017
Heat Demand	3.2	GJ / t CO₂ captured		Jakobsen 2017
Solvent makeup demand	1	kg / t CO₂ captured
H2O demand	611	kg / t CO₂ captured		IEAGHG 2008
NH3 demand	10	kg / t CO₂ captured		IEAGHG 2008
CO₂ Compression - 110 bar
Compression Losses	0	%		assumed
electricity demand	96	kWh / t CO₂ compressed		Schakel 2018
CO₂ Storage, geologic
Losses	1	% of CO₂ stored		assumed, based on Schakel 2008 and IPCC 2005
transport Distance	200	km		assumed
electricity demand	7	kWh / t CO₂ stored
Steam Boiler
efficiency	90	%
electricity demand	5	kWh / GJ steam		Tanzer 2020
Electricity Generation - IGCCC
efficiency	56.6	%		Tanzer 2020
Charcoal Production - Missouri-style kiln
timber in	2.7	t timber (dry mass) / t charcoal		Penisse 2001
CO₂ emissions	540	kg CO₂ / t charcoal		Penisse 2001
Carbon efficiency	69	% of C in wood in charcoal		Penisse 2001
Natural Carbonation
Service Life	50	years		assumption
Exposure Conditions	Outdoors, Exposed to rain; Indoors, Covered			assumption
Ks	1.6, 4.4	mm/sqrt(year)	for each exposure condition	CEN 2017, Annex BB.1
Surface Area	5, 5	m²	for each exposure condition	assumption
Degree of Carbonation	0.85, 0.4	%	for each exposure condition	CEN 2017, Annex BB.1
Maximum CO₂ uptake	0.49	t CO₂/t concrete		CEN 2017, Annex BB.1
Fuels, Energy Content
bituminous coal39	25.8	GJ/t fuel
natural gas39	48	GJ/t fuel
charcoal37	31.5	GJ/t fuel
wood chips39	20	GJ/t fuel
mixed waste, 50% Ca	15	GJ/t fuel
Fuels, Emission Factors		kg CO₂/GJ
bituminous coal39	96	kg CO₂/GJ		IPCC, Emission Factor Database
natural gas39	56	kg CO₂/GJ		IPCC, Emission Factor Database
charcoal37	112	kg CO₂/GJ		Penisse 2001
wood chips39	112	kg CO₂/GJ		IPCC, Emission Factor Database
mixed waste, 50% Ca	122	kg CO₂/GJ		assumption based on European Commission 2013 and the ECN Phyllis 2 Database
Upstream CO₂
aggregate	5	kg CO₂/t aggregate		ecoinvent 3.6: market for gravel, round CH
ammonia	1913	kg CO₂/t NH₃		ecoinvent 3.6: market for ammonia, liquid RER
bauxite	26	kg CO₂/t bauxite		ecoinvent 3.6: market for bauxite GLO
clay	10	kg CO₂/t clay		ecoinvent 3.6: market for clay CH
coal	169	kg CO₂/t coal		ecoinvent 3.6: market for hard coal Europe, without Russia and Turkey
concrete admixture	1620	kg CO₂/t admixture		ecoinvent 3.6: market for chemical, organic GLO
demolition	9	kg CO₂/t concrete demolished		ecoinvent 3.6: treatment of waste concrete, not reinforced, sorting plant Europe without Switze
electricity, current average	25	kg CO₂/GJ electricity		ecoinvent 3.6: market group for electricity, medium voltage RER (minus direct CO₂ intensity of generation for data year (2016, 295g CO₂/kWh)
gypsum	7	kg CO₂/t gypsum		ecoinvent 3.6: market for gypsum, mineral RER
iron ore	8	kg CO₂/t iron ore		ecoinvent 3.6: market for iron ore, crude ore, 46% Fe GLO
limestone	5	kg CO₂/t limestone		ecoinvent 3.6: market for limestone, crushed, washed CH
monoethanolamine	2557	kg CO₂/t MEA		ecoinvent 3.6: market for monoethanolamine GLO
natural gas	286	kg CO₂/t natural gas		ecoinvent 3.6: market group for natural gas, high pressure Europe without Switzerland
sand	11	kg CO₂/t sand		ecoinvent 3.6: market for sand RoW
timber, for charcoal	32	kg CO₂/t timber (dry)		ecoinvent 3.6: market for cleft timber, measured as dry mass Europe without Switzerland
transport, lorry	84	g CO₂/tkm		ecoinvent 3.6: market for transport, freight, lorry >32 metric ton, EURO6 RER
transport, pipeline	53	g CO₂/tkm		ecoinvent 3.6: market for transport, pipeline, long distance, natural gas RER
transport, rail	47	g CO₂/tkm		ecoinvent 3.6: market for transport, freight, lorry >32 metric ton, EURO6 RER
water	0.3	kg CO₂/m³ water		ecoinvent 3.6: market for tap water Europe without Switzerland
wood chips	58	kg CO₂/t wood chips (dry)		ecoinvent 3.6: market for wood chips, wet, measured as dry mass Europe without Switzerland

## Sheet: Main Results
Technology Scenario	Current, Average	Current, Average	Current, Benchmark	Current, Benchmark	Current, Benchmark	Current, Benchmark	Current, Benchmark	Current, Benchmark	Current, Benchmark	Future, Conservative	Future, Conservative	Future, Conservative	Future, Conservative	Future, Optimistic	Future, Optimistic	Future, Optimistic	Future, Optimistic
Case	No intervention	With CCS	No intervention	Bioenergy Use Only	With CCS	with BECCS	with 0.3% CO₂ injection	with 10% CO₂ curing	with 10% CO₂ curing, and 10% strength gain	No intervention	Bioenergy Use Only	With CCS	with BECCS	No intervention	Bioenergy Use Only	With CCS	with BECCS
in kg/m³ concrete, unless otherwise noted
Summary Results
net CO₂ (rounded to nearest 10kg/m³)	380	190	280	170	110	-70	270	320	290	220	180	20	-70	150	140	-50	-100
CO₂ emitted, total	405	220	379	411	212	284	365	405	372	350	362	153	198	331	334	131	170
CO₂ removed, total	30	30	104	244	104	349	99	87	79	133	184	133	265	181	192	181	272
CO₂ removed, biomass growth	11	11	0	139	0	245	0	0	0	29	79	29	161	50	62	50	142
CO₂ removed, concrete weathering, demolition	0	0	85	85	85	85	81	79	71	85	85	85	85	111	111	111	111
CO₂ removed, concrete weathering, service life	19	19	19	19	19	19	18	9	8	19	19	19	19	19	19	19	19
CO₂ in concrete, accelerated carbonation	0	0	0	0	0	0	0	17	15	0	0	0	0	0	0	0	0
stored CO₂	0	271	0	0	247	262	0	17	15	0	0	252	258	0	0	252	254
calcinated CO₂	174	174	174	174	174	174	165	174	156	174	174	174	174	174	174	174	174
electricity use (kWh)	31	78	24	24	67	69	23	34	31	24	24	61	62	24	24	61	61
timber	0	0	0	94	0	141	0	0	0	0	34	0	70	0	8	0	44
Contribution Results
CO₂ emitted, biogenic (total)	11	1	0	139	0	137	0	0	0	29	79	3	96	50	62	5	88
CO₂ emitted, biogenic, annual	7	7	0	0	0	0	0	0	0	14	14	14	14	25	25	25	25
CO₂ emitted, biogenic, of which cement kiln fuel	11	0	0	121	0	0	0	0	0	29	73	0	0	50	61	0	0
CO₂ emitted, biogenic, of which CCS loss	0	1	0	0	0	13	0	0	0	0	0	3	8	0	0	5	7
CO₂ emitted, biogenic, of which charcoal	0	0	0	19	0	19	0	0	0	0	7	0	7	0	2	0	2
CO₂ emitted, biogenic, of which heat for CCS	0	0	0	0	0	106	0	0	0	0	0	0	81	0	0	0	80
CO₂ emitted, calcination	174	19	174	174	19	19	165	174	156	174	174	19	19	174	174	19	19
CO₂ emitted, calcination, of which CCS loss	0	19	0	0	19	19	0	0	0	0	0	19	19	0	0	19	19
CO₂ emitted, fossil (total)	128	89	112	9	85	25	107	136	122	82	44	52	8	59	50	46	5
CO₂ emitted, fossil, of which AC CO₂ capture	0	0	0	0	0	0	0	9	8	0	0	0	0	0	0	0	0
CO₂ emitted, fossil, of which AC losses	0	0	0	0	0	0	0	11	10	0	0	0	0	0	0	0	0
CO₂ emitted, fossil, of which CCS loss	0	13	0	0	11	0	0	0	0	0	0	9	5	0	0	6	5
CO₂ emitted, fossil, of which cement kiln fuel	120	0	104	0	0	0	98	104	93	81	43	0	0	59	50	0	0
CO₂ emitted, fossil, of which electricity	8	8	9	9	9	9	8	12	11	1	1	1	1	0	0	0	0
CO₂ emitted, fossil, of which electricity for CCS	0	13	0	0	15	16	0	0	0	0	0	2	2	0	0	0	0
CO₂ emitted, fossil, of which heat for CCS	0	55	0	0	50	0	0	0	0	0	0	40	0	0	0	40	0
CO₂ emitted, infrastructure	3	3	3	3	3	4	3	3	3	3	3	3	3	3	3	3	3
CO₂ emitted, upstream	68	87	69	65	84	78	68	71	69	40	39	53	50	21	21	34	31
CO₂ emitted, upstream, of which transport	41	44	41	41	44	44	41	42	41	17	17	20	20	0	0	3	3
CO₂, demolition	21	21	21	21	21	21	21	21	21	22	22	22	22	23	23	23	23
CO₂ stored, biogenic	0	9	0	0	0	108	0	0	0	0	0	26	65	0	0	45	54
CO₂ stored, calcination	0	155	0	0	155	155	0	0	0	0	0	155	155	0	0	155	155
CO₂ stored, fossil	0	107	0	0	92	0	0	0	0	0	0	72	38	0	0	53	45
CO₂ Balance Results
biogenic CO₂, IN	11	11	0	139	0	245	0	0	0	29	79	29	161	50	62	50	142
biogenic CO₂, OUT	11	11	0	139	0	245	0	0	0	29	79	29	161	50	62	50	142
fossil CO₂, IN	128	195	112	9	177	25	107	136	122	82	44	124	46	59	50	99	50
fossil CO₂, OUT	128	195	112	9	177	25	107	136	122	82	44	124	46	59	50	99	50
calcination CO₂, IN	174	174	174	174	174	174	165	174	156	174	174	174	174	174	174	174	174
calcination CO₂, OUT	174	174	174	174	174	174	165	174	156	174	174	174	174	174	174	174	174
carbonation CO₂, % of calcination	0.11	0.11	0.6	0.6	0.6	0.6	0.6	0.6	0.6	0.6	0.6	0.6	0.6	0.75	0.75	0.75	0.75

## Sheet: Sensitivity Analyses
	No Bioenergy or CCS	CCS Only	Bioenergy Only	BECCS
Benchmark (net CO₂, kg CO₂/m³ concrete)	280	110	170	-70
	as change from benchmark in ±kg CO₂/m³ concrete
Electricity
800 g CO₂/kWh	+10	+27	+10	28
0 g CO₂/kWh	-10	-26	-10	+-27
Transport
+100% CO₂ intensity	+41	+41	+41	+41
full decarbonization	-41	-41	-41	-41
Clinker Kiln Efficiency
4.0 GJ/t clinker	+23	+10	+1	-20
2.5 GJ/t clinker	-27	-12	-1	+22
CO₂ reboiler efficiency
4.5 GJ/t CO₂	n.a	+23	n.a	+10
2.5 GJ/t CO₂	n.a	-12	n.a	-1
Capture of CO₂ from CO₂ capture boiler	n.a	-43	n.a	-90
Carbonation after demolition
No further carbonation	+85	+85	+86	+86
Carbonation to 80% of calcination CO₂	-35	-35	-34	-34

## Sheet: CMUs
Recipe for Concrete masonry units (CMUs), with a 28-day compressive strength of approximate 18MPa. 1 m³ represents 1270 190x390mm CMUs
ingredient	kg per m³ CMUs
cement	203
sand	1053
gravel	698
water	1142
admixtures	0
Accelerated Carbonation Case Considered
This case uses the same parameters as the OPC CO₂ curing case. However, the CO₂ uptake was assumed to be 15%, based on accelerated carbonation experiments on CMUs [Shao 2014 and El-Hassan 2014] and the higher carbonation rate of lower-strength concrete.
Exposure Conditions. Increased surface area compared to OPC is due to the hollow nature of the CMUs. Otherwise the same as OPC.
Surface Area	9.4, 9.4	m2
Ks	2.7, 6.6
Main Results
									Current, Average	Current, Average	Current, Benchmark	Current, Benchmark	Current, Benchmark	Current, Benchmark	Current, Benchmark	Current, Benchmark	Future, Conservative	Future, Conservative	Future, Conservative	Future, Conservative	Future, Optimistic	Future, Optimistic	Future, Optimistic	Future, Optimistic
									No intervention	With CCS	No intervention	Bioenergy Use Only	With CCS	with BECCS	with 15% CO₂ curing	with 15% CO₂ curing, and 10% strength gain	No intervention	Bioenergy Use Only	With CCS	with BECCS	No intervention	Bioenergy Use Only	With CCS	with BECCS
								net CO₂, (rounded to nearest 10kg/m³)	230	120	190	130	90	-10	220	210	150	120	30	-20	100	100	-20	-50
								CO₂ emitted, total	267	158	250	269	151	194	271	251	225	231	108	135	209	210	91	114
								CO₂ removed, total	40	40	62	144	62	206	47	42	78	108	78	156	107	114	107	161
								CO₂ removed, biomass growth	6	6	0	82	0	145	0	0	17	47	17	95	30	37	30	84
								CO₂ removed, concrete weathering, demolition	0	0	28	28	28	28	25	22	28	28	28	28	43	43	43	43
								CO₂ removed, concrete weathering, service life	34	34	34	34	34	34	22	20	34	34	34	34	34	34	34	34
								calcinated CO₂	103	103	103	103	103	103	103	92	103	103	103	103	103	103	103	103
								stored CO₂	0	160	0	0	146	155	15	13	0	0	149	152	0	0	149	150
								CO₂ in concrete, accelerated carbonation	0	0	0	0	0	0	15	13	0	0	0	0	0	0	0	0
								concrete, mass	2069	2069	2069	2069	2069	2069	2083	2079	2169	2169	2169	2169	2319	2319	2319	2319
								electricity use (kWh)	29	57	20	20	46	47	24	23	21	21	42	43	21	21	43	43
								timber	0	0	0	56	0	83	0	0	0	20	0	42	0	5	0	26
			Overall, the production of CMUs is less CO₂ intensive an OPC. The benchmark production of 1 m³ of CMUs, without bioenergy or CCS, was estimated to emit 250kg CO₂/m³, including 105kg from calcination. Approximately 35kg CO₂/m³, is recarbonated during the concrete service life, triple the fraction of calcination CO₂ as OPC. This is due both to the higher surface area of construction made from hollo…
With Accelerated Carbonation
	No AC	15% CO₂ curing	15% CO₂ curing, 10% strength gain
	kg CO₂/m³ concrete	as change from the benchmark cake
Net CO₂	190	+36	+20
CO₂ stored in concrete	0	+15	+13
CO₂ emitted, AC CO₂ capture and transport	0	+10	+9
CO₂ lost during carbonation	0	+10	+9
CO₂ from cement production and its upstream supply chains	174	+0	-17
CO₂ removed by natural weathering, service life	34	-12	-14
CO₂ removed by natural weathering, demolition	28	-3	-6
total electricity use	20	+4	+2
Note: Avoided emissions from stored CO₂ are not included in the net CO₂
Sensitivity Analysis
	No Bioenergy or CCS	CCS Only	Bioenergy Only	BECCS
Benchmark, net CO₂, kg/m³ CMU	190	90	120	-10
	change from benchmark, ±kg CO₂/m³ CMU
Electricity
800 g CO₂/kWh	+8	+18	+8	+19
0 g CO₂/kWh	-8	-18	-8	-19
Transport
+100% CO₂ intensity	+36	+36	+36	+36
full decarbonization	-36	-36	-36	-36
Clinker Kiln Efficiency
4.0 GJ/t clinker	+14	+6	0	-12
2.5 GJ/t clinker	-16	-7	0	13
CO₂ reboiler efficiency
4.0 GJ/t CO₂	n.a	-7	n.a	-1
2.5 GJ/t CO₂	n.a	8	n.a	+1
Capture of CO₂ from CO₂ capture boiler	n.a	-25	n.a	-53
End-of-life carbonation
No further carbonation	+26	+28	+33	+25
Carbonation to 80% of calcination CO₂	-22	-21	-16	-23
Impact of Biomass Rotation Period (Current, benchmark technology scenario)
Impact of Concrete Exposure Conditions (Current, benchmark technology scenario)
			solid line	No bioenergy or CCS
			dashed line	Bioenergy only
			dotted line	CCS only
			dashdot line	BECCS

## Sheet: Acc Carb Literature
				Source	Product Type	CO₂ Uptake	28 day Strength Change
				Monkman & MacDonald 2017	Ready Mix, 27.5 mpa, 0.3% CO₂ injection	0.0003	0.05
				He et al 2017	Cement paste, 2hr cure	0.073	0.0755627
				He et al 2017	Cement paste, injection to mix	0.034	-0.839879
				Rostami et al 2011	2 hr cure	0.09	-0.109699
				Shao 2014	CMUs	0.22	0.118644
				Shao 2014	CMUs	0.15	0.112195
				Shao 2014	CMUs	0.17	0.0585366
				Shao 2014	CMUs	0.19	0.682927
				Shao 2014	CMUs	0.18	-0.0439024
				Qian et al 2018	mortar	0.00388889	0.16
				Qian et al 2018	mortar	0.0116667	0.13
				Monkman & Shao	"river sand concrete"	0.127	0.167598
Source	Scope	Scale	Concrete Composition (kg/m³) [w/o CO₂ inject]	CO₂ injection rate	CO₂ injection conditions	CO₂ uptake	Concrete Properties	Electricity Use	Notes
Monkman & MacDonald 2017 (CarbonCure)	27.6 MPa Concrete w AC	Commercial	Cement: 321 [338] Sand: 792 [778] Agg: 930 Slag: 15 Fly Ash: 65 Water: 179 Admix: 0.735	0.482kg CO₂/m³ concrete	Into ready-mix truck	0.289 kg absorbed -60% absorb. Eff	5% cement reduction (-16.9 kg) 1.8% sand increase (+14 kg)	4.88 kWh/m³ - plant 0.018 kWh/m³ - CO₂ injection (0.038 kWh/kg CO₂) 200 kWh/t CO₂ - CO₂ from flue gas	Assumes cement emissions are 1040 kg/t cement
Qian et al 2018	Mortar w AC	Lab	Cement: 358 /355 [360] Sand: 180 Sand: 908 Slaked Lime: 1.8/5.4 [0]	2L/min CO₂ in beaker of 500 mL water + slaked lime for 3 min. Stirred.	bubbled into mix of water + slaked lime for 10 min (1% mix) or 15 mix (3% mix)	1.4 and 4.2 kg CO₂/m³ concrete	28 day com str: +16/13% 56 day com str: +12/10% 28 day flex str: +105%	not provided	slaked lime has had it's CO₂ removed, so must be counted in cementious materials
He et al 2017	Cement paste with AC	Lab	W/C: 0.15	5 L/min during mixing	99.5% CO₂ injected during cement mixing 99.5 % CO₂ curing for 2 hr at 1 bar	CO₂ mix only: 3.4% Cure only: 7.3% mix and cure: 10.8% (% of mortar mass? Or cement mass?)	Com Str @ 28 day: Control: 62.2 MPa CO₂ mix only: 10.6 MPa CO₂ cure only: 66.9 MPa mix and cure: 18.9 Mpa	not provided
Rostami et al 2011	Concrete w AC	Lab	cement: 286 Sand: 1050 agg: 730 water: 100	99.5 % CO₂ @ 1.5 bar	2 hr steam cure followed by 2 hr CO₂ cure	8-9% mass of cement	Com Str @ 28 day, air cure: 4 hr steam: 29.9 2 hr steam + 2 hr CO₂: 26.2 Com Str @ 90 day, air cure: 4 hr steam: 30.1 2 hr steam + 2 hr CO₂: 28.2	not provided
El-Hassan & Shao	CMUs w AC	Lab	cement: 241 water: 787 slag: 1502	0.7 bar, pure CO	2-4 hr CO₂ cure (c),after diff length of air cure (a)air cure is at 25C and 50% humid	0a+4c: 7.5% m cement 4-18a + 4c: 21-24% 18a + 2 c: 20% (15kg block --> 0.47 kg CO₂ uptake)	not provided	4a+4c: 155 kWh/m³ (steam cure ref: 164 kWh/m³)
Shao 2014	CMUs w AC	lab	per 16kg block: cement: 1.6 water: 0.9 sand: 8.3 agg: 5.5	1.5 bar pure CO₂	18 hr hydration pre-set 20% RH 2, 4, 24, 48 hr	1bar-2hr: 15% 2bar-2hr: 17% 2bar-24hr: 19% 2bar-48hr: 28% 5bar-2h: 18% 5bar-4hr: 22% 5bar-24hr: 24%	Com Str @ 28 day - samples control: 20.5MPa 1bar-2hr: 22.8 2bar-2hr: 21.7 5bar-2hr: 19.6 2 bar-24hr: 34.5 2 bar-48hr 33.6 Com Str @ 28 day - blocks control: 11.8 5bar-4hr: 13.2	not provided	CO₂ is recovered vi absorption recovery 50% concentration
Carbicrate	CMUs w AC	commercial	steel slag replaces 100% of cement, 6.0% water (v 5.5%) same density as normal block (2250kg/m³)	not provided	not provided	1 kg/block	26 Mpa (v 20 control)	not provided
Yoshioka et al 2013	boundary blocks, foundations blocks, paving blocks w AC	commercial	coal ash replacing cement, "special admixture"	not provided	coal plant flue gas (15-20% CO₂)	100-200 kg CO₂/m³	"required performance is satisfied"	not provided
Monkman & Shao 2010	CMUs w AC	lab	not provided	2hr, 150kpa, 99% CO₂ 5hr, 500kPA (not constant; 7 injections), flue gas 14% CO₂	not provided	99% CO₂: 9.8% 14% CO₂: 6.3%	not provided	99% CO₂: 2.76 kWh/ t CO₂[/hr] (CO₂ is compressed to 2 MPa, so is decompressed to desired pressure) Flue Gas (which needs to be pressurized): 150kPA: 11.3 kWh/t flue gas 300: 34.7 kWh/t flue gas 54.5 kWh/t flue gas (14% CO₂; 85% compression eff)
Monkman & Shao 2010	river sand concrete w AC	lab	per 822.3g sample (dry): 274.1 g cement 548.2 sand	2hr carbonation 99% CO₂	not provided	12.7% cement mass	Com Str @ 28 days: 20.9 (17.9 control)	not provided

## Sheet: References
References in this Supplemental Information
ECN.TNO. Phyllis2, database for (treated) biomass, algae, feedstocks for biogas production and biochar [Internet]. Available from: https://phyllis.nl/?nr=ECN-M--07-024
El-Hassan H, Shao Y. Carbon Storage through Concrete Block Carbonation. Journal of Clean Energy Technologies. 2014;2(3):287–91.
European Commission. Best Available Techniques (BAT) Reference Document for the Production of Cement, Lime and Magnesium Oxide. 2013 pp. 1–501.
European Committee for Standardization. European Standard EN-16757: Sustainability of construction works - Environmental product declarations - Product Category Rules for concrete and concrete elements. 2017.
He Z, Li Z, Shao Y. Effect of carbonation mixing on CO₂ uptake and strength gain in concrete. Journal of Materials in Civil Engineering. 2017;29(10):1–8.
IEAGHG. Carbon Dioxide Capture in the Cement Industry [Internet]. 2008 pp. 1–180. Report No.: July. Available from: http://hub.globalccsinstitute.com/sites/default/files/publications/95751/CO₂-capture-cement-industrypdf.pdf
IPCC. Carbon Dioxide Capture and Storage. 2005.
IPCC. Emission Factor Database [Internet]. 2019 [cited 2019 Nov 28]. Available from: https://www.ipcc-nggip.iges.or.jp/EFDB/main.php
Jakobsen J, Roussanaly S, Anantharaman R. A techno-economic case study of CO₂ capture, transport and storage chain from a cement plant in Norway. Journal of Cleaner Production [Internet]. 2017;144:523–39. Available from: http://dx.doi.org/10.1016/j.jclepro.2016.12.120
Monkman S, MacDonald M. On carbon dioxide utilization as a means to improve the sustainability of ready-mixed concrete. Journal of Cleaner Production [Internet]. 2017;167:365–75. Available from: http://dx.doi.org/10.1016/j.jclepro.2017.08.194
Monkman S, Shao Y. Integration of carbon sequestration into curing process of precast concrete. Canadian Journal of Civil Engineering. 2010;37(2):302–10.
Pennise DM, Smith KR, Kithinji JP, Rezende ME, Raad TJ, Zhang J, et al. Emissions of greenhouse gases and other airborne pollutants from charcoal making in Kenya and Brazil. Journal of Geophysical Research Atmospheres. 2001;106(D20):24143–55.
Qian X, Wang J, Fang Y, Wang L. Carbon dioxide as an admixture for better performance of OPC-based concrete. Journal of CO₂ Utilization [Internet]. 2018;25(March):31–8. Available from: https://doi.org/10.1016/j.jcou.2018.03.007
Rostami V, Shao Y, Boyd AJ. Durability of concrete pipes subjected to combined steam and carbonation curing. Construction and Building Materials [Internet]. 2011;25(8):3345–55. Available from: http://dx.doi.org/10.1016/j.conbuildmat.2011.03.025
Schakel W, Roxanne C, Tokheim L-a, Hammer A, Worrell E, Ramírez A. Impact of fuel selection on the environmental performance of post- combustion calcium looping applied to a cement plant. Applied Energy [Internet]. 2018;210(September 2017):75–87. Available from: https://doi.org/10.1016/j.apenergy.2017.10.123
Shao Y. Beneficial Use of Carbon Dioxide in Precast Concrete Production. National Energy Technology Laboratory; 2014 pp. 1–30.
Tanzer SE, Blok K, Ramírez A. Can bioenergy with carbon capture and storage result in carbon negative steel. International Journal of Greenhouse Gas Control [Internet]. 2020;100. Available from: https://doi.org/10.1016/j.ijggc.2020.103104
Wernet G, Bauer C, Steubing B, Reinhard J, Moreno-Ruiz E, Weidema B. The ecoinvent database version 3 (part I): overview and methodology. The International Journal of Life Cycle Assessment [Internet]. 2016;21(9):1218–30. Available from: http://link.springer.com/10.1007/s11367-016-1087-8
Worrell E, Price L, Neelis M, Galitsky C, Nan Z. World Best Practice Energy Intensity Values for Selected Industrial Sectors. Lawrence Berkeley National Laboratory. 2007;(February):51.
Yoshioka I, Obata D, Nanjo H, Yokozeki K, Torichigai T, Morioka M, et al. New ecological concrete that reduces CO₂ emissions below zero level ∼ New method for CO₂ capture and storage ∼. Energy Procedia [Internet]. 2013;37:6018–25. Available from: http://carbicrete.com/wp-content/uploads/2020/04/carbicrete-datasheet-2-en.pdf
